# Supplementary material
Source: Springer Nature journal article supplement (https://www.springermedizin.de/resource/supplementary/12906_2013_1584_MOESM1_ESM.pdf/9522328)

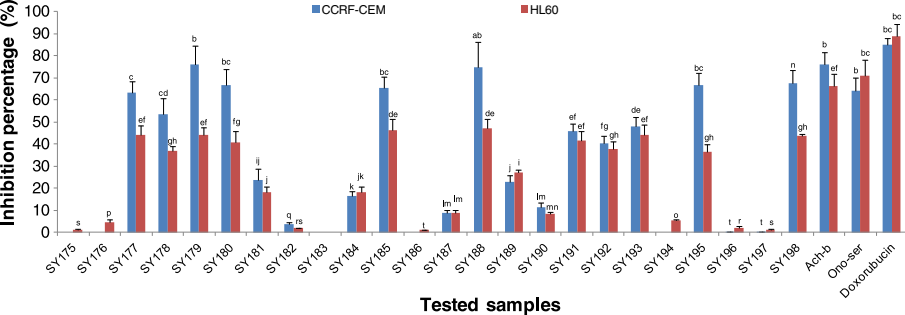

Supplement: MOESM1 [file 9522328]
